# Supplementary material for: Effect of Graphene Oxide on the Mechanical Properties and Durability of High-Strength Lightweight Concrete Containing Shale Ceramsite
Source: MDPI journal article supplement (doi:10.3390/ma16072756), 2023-03-30
Supplement: s1 [file s1]

# Effect of Graphene Oxide on the Mechanical Properties and Durability of High-Strength Lightweight Concrete Containing Shale Ceramsite

Xiaojiang Hong <sup>1,2</sup>, Jin Chai Lee <sup>1,\*</sup>, Jing Lin Ng <sup>1,2</sup>, Zeety Md Yusof <sup>3</sup>, Qian He <sup>1,2</sup> and Qiansha Li <sup>1,2</sup>

<sup>1</sup> Department of Civil Engineering, Faculty of Engineering, Technology and Built Environment, UCSI University, Kuala Lumpur 56000, Malaysia

<sup>2</sup> Department of Civil Engineering, Faculty of Civil and Hydraulic Engineering, Xichang University, Xichang 615013, China

<sup>3</sup> Department of Civil Engineering, Faculty of Civil Engineering and Built Environment, Universiti Tun Hussein Onn Malaysia, Parit Raja 86400, Malaysia

\* Correspondence: leejc@ucsiuniversity.edu.my or jinlee861@gmail.com

|              |                                                                 |
|--------------|-----------------------------------------------------------------|
| Formula (S1) | Formula of the chloride ion migration coefficient ( $D_{RCM}$ ) |
| Formula (S2) | Formula of mass loss rate of freezing–thawing resistance        |
| Formula (S3) | Formula of the relative elastic modulus                         |
| Formula (S4) | Formula of mass loss rate of sulfate attack resistance          |
| Formula (S5) | Formula of corrosion resistance coefficient                     |

**1 Formula of chloride-ion migration coefficient ( $D_{RCM}$ ):**

$$D_{RCM} = \frac{0.0239 \times (273 + T)L}{(U - 2)t} (X_d - 0.0238 \sqrt{\frac{(273 + T)LX_d}{U - 2}}) \quad (S1)$$

where  $D_{RCM}$  is the unsteady transfer coefficient of concrete, accurate to  $0.01 \times 10^{-12}$  m<sup>2</sup>/s;  $T$  is the average of the initial and final temperatures of the anode solution, °C;  $U$  is the test voltage, V;  $L$  is the thickness of the specimen, mm;  $X_d$  is the average chloride-ion penetration depth, mm;  $t$  is the test duration, h.

**2 Formula of mass loss rate of freezing–thawing resistance:**

$$\Delta W_{ni} = \frac{W_{0i} - W_{ni}}{W_{0i}} \times 100 \quad (S2)$$

where  $\Delta W_{ni}$  is the mass loss rate of the  $i$ th specimen after  $n$  freeze–thaw cycles, %, accurate to 0.01;  $W_{0i}$  is the mass of the  $i$ th specimen before the freeze–thaw cycle, g;  $W_{ni}$  is the mass of the  $i$ th specimen after  $n$  freeze–thaw cycles, g.

**3 Formula of relative dynamic elastic modulus:**

$$P_i = \frac{f_{ni}^2}{f_{0i}^2} \times 100 \quad (S3)$$

where  $P_i$  is the relative dynamic elastic modulus of the  $i$ th specimen after  $n$  freeze–thaw cycles, %, accurate to 0.1;  $f_{0i}$  is the initial value of transverse fundamental frequency of the  $i$ th specimen before the freeze–thaw cycle, Hz;  $f_{ni}$  is the test value of the transverse fundamental frequency of the  $i$ th specimen after  $n$  freeze–thaw cycles, Hz.

**4 Formula of mass loss rate of sulfate attack resistance:**

$$\Delta W'_{ni} = \frac{W'_{0i} - W'_{ni}}{W'_{0i}} \times 100 \quad (S4)$$

where  $\Delta W'_{ni}$  is the mass loss rate of the  $i$ th specimen after  $n$  wet–dry cycles, %, accurate to 0.01;  $W'_{0i}$  is the mass of the  $i$ th specimen before the wet–dry cycle, g;  $W'_{ni}$  is the mass of the  $i$ th specimen after  $n$  wet–dry cycles, g.

**5 Formula of corrosion resistance coefficient:**

$$K_f = \frac{f_{cn}}{f_{c0}} \times 100 \quad (S5)$$

where  $K_f$  is the corrosion resistance coefficient, %;  $f_{c0}$  is the compressive strength value of the specimen under standard curing at the same age as sulfate corrosion., accurate to 0.1 MPa;  $f_{cn}$  is the compressive strength value of the specimen corroded by sulfate after  $n$  times of dry and wet cycles, accurate to 0.1 MPa.
